# Supplementary material for: Chicory R2R3-MYB transcription factors CiMYB5 and CiMYB3 regulate fructan 1-exohydrolase expression in response to abiotic stress and hormonal cues
Source: PubMed Central journal article supplement (PMC5853547; doi:10.1093/jxb/erx210), 2017-07-20
Supplement: erx210_suppl_supplementary-figures-s1-s3_table-s1.pdf [file erx210_suppl_supplementary-figures-s1-s3_table-s1.pdf]

## Supplementary data

### **Fig. S1 Comparing the background growth (resistance to Aureobasidin A (AbA) antibiotics) of different *p1-FEH* bait yeast strains.**

For the generation of bait yeast strains, 341 bp (-387 to -727 bp upstream of ATG) of the *1-FEH1* promoter, 201 bp (-1 to -207 bp upstream of ATG) of the *1-FEH2a* promoter, and 1147 bp (-1 to -1147 bp upstream of ATG) of *1-FEH2a* promoter were respectively cloned into pAbAi vector, which were then integrated into the yeast genome. Positive clones were selected on uracil-deficient synthetic dropout media (SD/-Ura). The concentration of Aureobasidin A (AbA) used to eliminate the background of *p1-FEH1*, *p1-FEH2a\_201bp* and *p1-FEH2a\_1147bp* bait strains were 100 ng ml<sup>-1</sup>, 300 ng ml<sup>-1</sup> and 700 ng ml<sup>-1</sup> respectively.

### **Fig. S2 Comparing the protein sequences of chicory R2R3 MYB transcription factors CiMYB3, CiMYB4 and CiMYB5 with *Arabidopsis* R2R3 MYB factors belonging to subgroup 20.**

Multiple sequence alignment was performed via *T-coffee* server (<http://www.tcoffee.org/>). The MYB domain is underlined. The calmodulin binding motif (RWLNYLRPDVRRGNITLE) is indicated in blue color. Asterisks, colons and full stops indicate positions that have an identical, conserved and weakly conserved residue, respectively. Accession numbers refer to Fig. 4.

### **Fig. S3 Expression of FAZY genes (*1-SST*, *1-FFT*, *1-FEH1* and *1-FEH2*) and transcription factor genes (*CiMYB3* and *CiMYB5*) were stable in CiHRCs grown in standard medium (SM, 3% sucrose) during the time-course sampling.**

Gene expression levels were detected by qRT-PCR and normalized against the expression of two reference genes (RPL19 and Actin). Bars indicate means  $\pm$  SD of three independent replicates.

**Fig. S1**

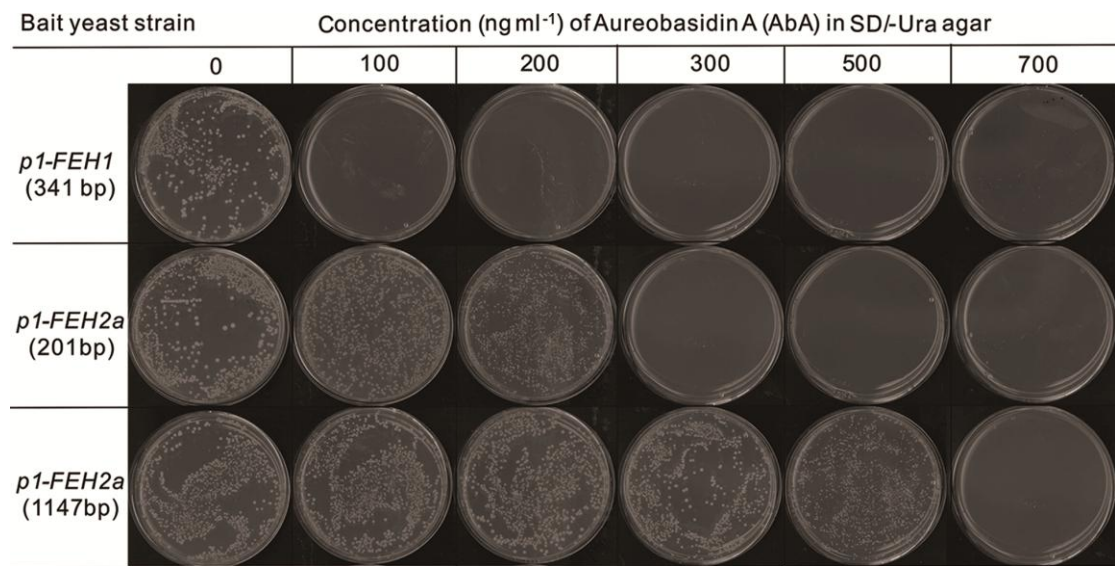



**Fig. S3**

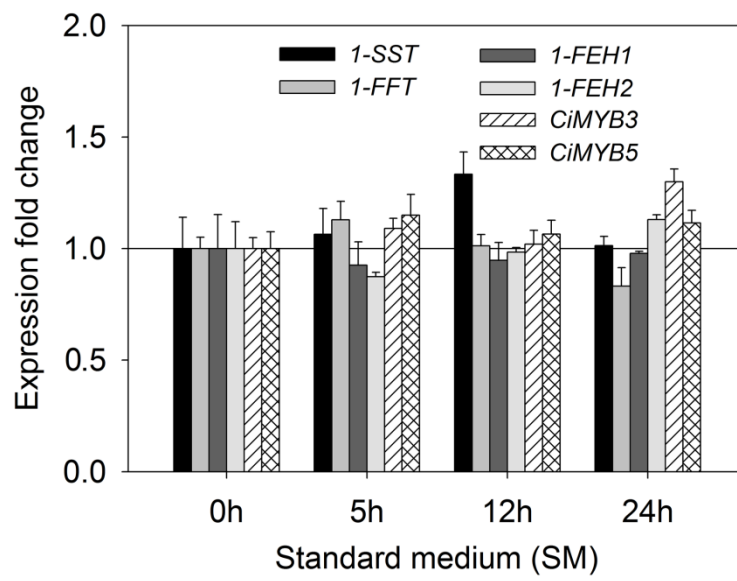

**Table S1. Primers used for quantitative real-time PCR analysis, gateway cloning and Gibson assembly cloning.**

The attB1 and attB2 overhangs of gateway primers are underlined. For Gibson assembly, the pGADT7 and pAbAi vectors (Clontech, Takara Bio Company) were linearized by EcoRI and BbsI FastDigest enzymes (Thermo Fisher Scientific), respectively. The overhangs (in small letters) are overlapping DNA fragments with corresponding vector backbone sequences.

| Gene           | Description | Sequence (5'-3')         |
|----------------|-------------|--------------------------|
| <b>qRT-PCR</b> |             |                          |
| <i>Actin</i>   | F           | CCAAATCCAGCTCATCAGTCG    |
|                | R           | TCTTTCGGCTCCGATGGTGAT    |
| <i>RPL19</i>   | F           | CTGCCAGCGTCCTCAAGTG      |
|                | R           | CATTGGGATCAAGCCAAACCT    |
| <i>1-SST</i>   | F           | CCAACAACCATCAGGGAGGAG    |
|                | R           | AGCAACGGAGCTGTGAACGT     |
| <i>1-FFT</i>   | F           | CGGCTACGCAGTTGGACATAG    |
|                | R           | CTCGTGGTGCAACCGTATTCA    |
| <i>1-FEH1</i>  | F           | GATAAACGATCCTAACGGAC     |
|                | R           | GTAGAACAGATGGTAAACTCCA   |
| <i>1-FEH2</i>  | F           | TAAAGACTTGAAAGAACAAAGTG  |
|                | R           | TGCACCATAACTTGTCGTGTCG   |
| <i>CiMYB1</i>  | F           | ACAAGAACAACGACAACAGCAG   |
|                | R           | CAACCACGATTGGAGGCACATA   |
| <i>CiMYB3</i>  | F           | GCTGCCTGAAATGCCACAAC     |
|                | R           | AATCCCATCATATCAAACCCTCCT |
| <i>CiMYB4</i>  | F           | GCTGCCTGAAATGCCACAAC     |
|                | R           | AATCCCATCATATCAAACCCTCCT |
| <i>CiMYB5</i>  | F           | GGACACGATGCGGTATCTTTGG   |
|                | R           | TGGTGGTGGAGGAGGAGGAA     |

| <b>Gateway cloning</b>         |          |                                                                  |
|--------------------------------|----------|------------------------------------------------------------------|
| <i>pI-SST</i>                  | GW_attB1 | <u>GGGGACAAGTTTGTACAAAAAAGCAGGCTTCTACTATAGGGCACGCGTGGTC</u>      |
|                                | GW_attB2 | <u>GGGGACCACTTTGTACAAGAAAGCTGGGTTGAGTGTGGTAAGGGGTGATTA</u>       |
| <i>pI-FFT</i>                  | GW_attB1 | <u>GGGGACAAGTTTGTACAAAAAAGCAGGCTTCTACGACTTACTATAGGGCACGC</u>     |
|                                | GW_attB2 | <u>GGGGACCACTTTGTACAAGAAAGCTGGGTTTGTTCGAGGGAAATGGGCC</u>         |
| <i>pI-FEH1</i>                 | GW_attB1 | <u>GGGGACAAGTTTGTACAAAAAAGCAGGCTTCCAAAAACCAAAGTTCGTTACCTATTT</u> |
|                                | GW_attB2 | <u>GGGGACCACTTTGTACAAGAAAGCTGGGTTTCTTTCTGAGCACATTGTTCACT</u>     |
| <i>pI-FEH2a</i>                | GW_attB1 | <u>GGGGACAAGTTTGTACAAAAAAGCAGGCTTCCCGCAGACCTCTATCCATATATTAGT</u> |
|                                | GW_attB2 | <u>GGGGACCACTTTGTACAAGAAAGCTGGGTTTCATGATGAGTGTGTGTGTTGG</u>      |
| <i>pI-FEH2b</i>                | GW_attB1 | <u>GGGGACAAGTTTGTACAAAAAAGCAGGCTTCGGCTCATAAGTCCATGGTCGTGAA</u>   |
|                                | GW_attB2 | <u>GGGGACCACTTTGTACAAGAAAGCTGGGTTGAGATTTCTTCATGATGAGTGTGTG</u>   |
| <i>CiMYB1</i>                  | GW_attB1 | <u>GGGGACAAGTTTGTACAAAAAAGCAGGCTTCATGTATTTGGCAGTCATGGGA</u>      |
|                                | GW_attB2 | <u>GGGGACCACTTTGTACAAGAAAGCTGGGTTCTAGCTAGCTTTAGCAGCATGAAAG</u>   |
| <i>CiMYB3</i>                  | GW_attB1 | <u>GGGGACAAGTTTGTACAAAAAAGCAGGCTTCATGAGGGGAACAAAGAACATG</u>      |
|                                | GW_attB2 | <u>GGGGACCACTTTGTACAAGAAAGCTGGGTTTTACCACAATCCGTCCATGTT</u>       |
| <i>CiMYB4</i>                  | GW_attB1 | <u>GGGGACAAGTTTGTACAAAAAAGCAGGCTTCATGAGGGCTGCTAAGAAGACG</u>      |
|                                | GW_attB2 | <u>GGGGACCACTTTGTACAAGAAAGCTGGGTTCCATAATTCATCTATGTTCCAAAAAGT</u> |
| <i>CiMYB5</i>                  | GW_attB1 | <u>GGGGACAAGTTTGTACAAAAAAGCAGGCTTCATGAATACCGACAACCTGTGTGG</u>    |
|                                | GW_attB2 | <u>GGGGACCACTTTGTACAAGAAAGCTGGGTTTCACATGTTGAATTGCTGTTTTAAA</u>   |
| <b>Gibson assembly cloning</b> |          |                                                                  |
| <i>CiMYB3</i>                  | F_pGADT7 | tatggccatggagccagtgCCATGAGGGGAACAAAGAACATG                       |
|                                | R_pGADT7 | atcgatgccaccgggtggTCTTACCACAATCCGTCCATGTT                        |
| <i>CiMYB4</i>                  | F_pGADT7 | tatggccatggagccagtgCCATGAGGGCTGCTAAGAAGACGAC                     |
|                                | R_pGADT7 | atcgatgccaccgggtggTCCTACCATAATTCATCTATGTTCC                      |
| <i>CiMYB5</i>                  | F_pGADT7 | tatggccatggagccagtgCCATGAATACCGACAACCTGTGTGG                     |
|                                | R_pGADT7 | atcgatgccaccgggtggTCTCACATGTTGAATTGCTGTTTT                       |
| <i>pFEH1</i><br>(341 bp)       | F_pAbAi  | gaattcgagctcggtacATTGGCCTTAATGTCCGACGA                           |
|                                | R_pAbAi  | gtcgacagatccccgggtacGACCAGTATACTTGTGTTGACCTGT                    |
| <i>pFEH2a</i><br>(201 bp)      | F_pAbAi  | gaattcgagctcggtacAGTGAGGGGTAGGCCTGGCC                            |
|                                | R_pAbAi  | gtcgacagatccccgggtacGATGAGTGTGTGTGTTGGGG                         |
| <i>pFEH2a</i><br>(1147 bp)     | F_pAbAi  | gaattcgagctcggtacCCGCAGACCTCTATCCATATATTAGT                      |
|                                | R_pAbAi  | gtcgacagatccccgggtacCATGATGAGTGTGTGTGTTGG                        |
